# Supplementary material
Source: PubMed Central journal article supplement (PMC5824047)
Supplement: JCM.01388-17_zjm999095845s1.pdf [file JCM.01388-17_zjm999095845s1.pdf]

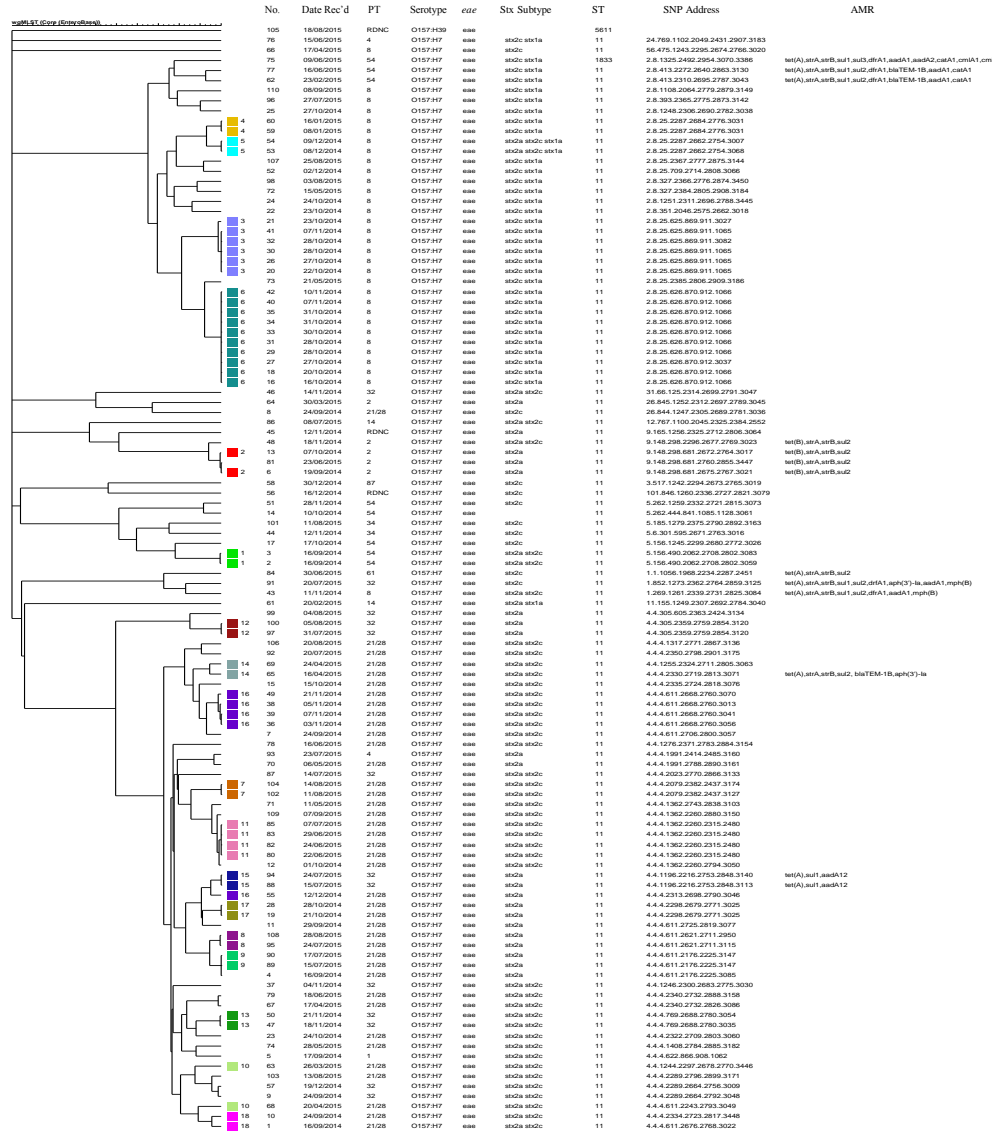

Figure S1. Denrogram based on the allelic profiles of 2513 egMLST target genes for the 110 *E.coli* O157. Different colours represent temporally related isolates with the same MLVA profiles (Groups 1 – 18). The columns represent the strain no., date received by SERL, phage type (PT), serotype, presence of *eae*, stx subtype, sequence type (ST), Achtman, SNP address, and antibiotic resistance gene profile (AMR).
