# Supplementary material
Source: PubMed Central journal article supplement (PMC5824047)
Supplement: JCM.01388-17_zjm999095845s2.pdf [file JCM.01388-17_zjm999095845s2.pdf]

wgMLST (Core (Enterobase))

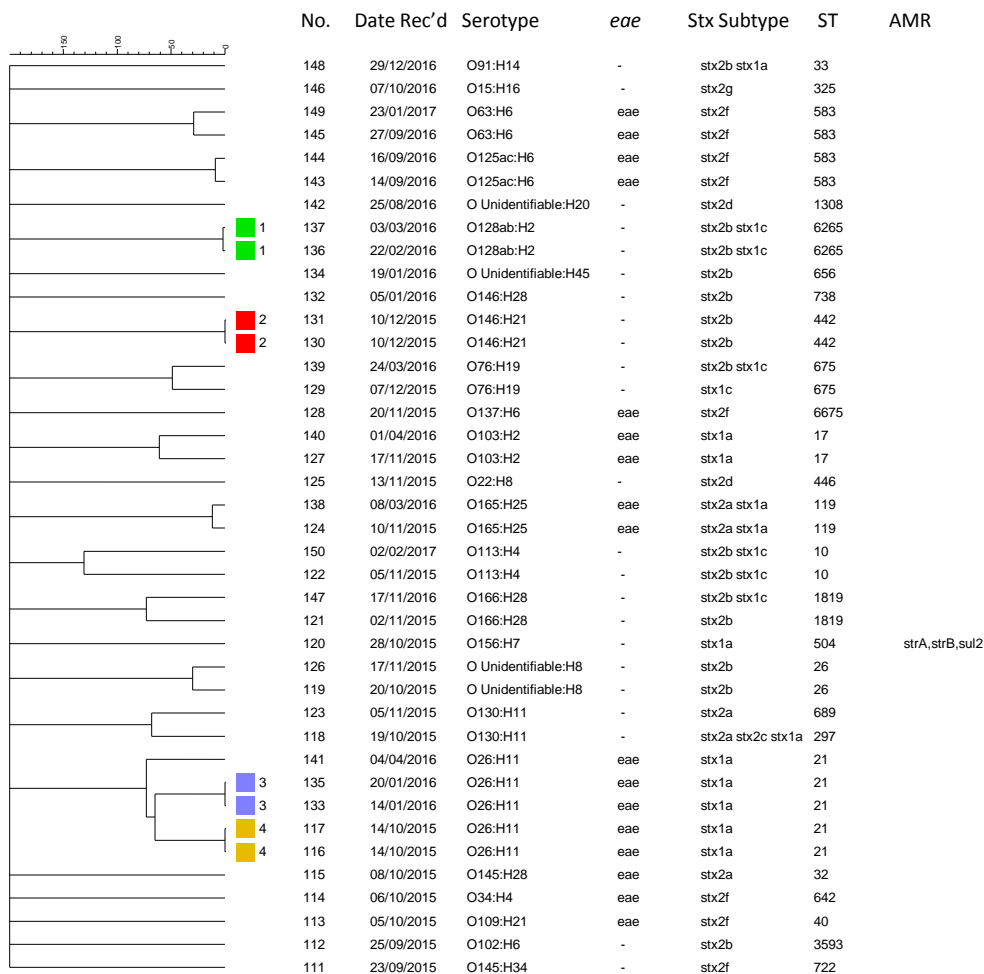

Figure S2. Dendrogram based on the allelic profiles of 2513 cgMLST target genes for the 40 non-O157 *E. coli*. Different colours represent known epidemiological linked cases. The columns represent the strain no., date received by SERL, serotype, presence of *eae*, *stx* subtype, sequence type (ST; Achtman) and antibiotic resistance gene profile (AMR).
